# Supplementary material for: How spin relaxes and dephases in bulk halide perovskites
Source: PubMed Central journal article supplement (PMC10761878; doi:10.1038/s41467-023-42835-w), 2024-01-02
Supplement: 41467_2023_42835_MOESM1_ESM.pdf [file 41467_2023_42835_MOESM1_ESM.pdf]

# Supplementary Information for: How Spin Relaxes and Dephases in Bulk Halide Perovskites

Junqing Xu<sup>a,1,2</sup> Kejun Li<sup>a,3</sup> Uyen Huynh,<sup>4</sup> Mayada Fadel,<sup>5</sup> Jinsong Huang,<sup>6</sup> Ravishankar Sundararaman,<sup>5,\*</sup> Valy Vardeny,<sup>4</sup> and Yuan Ping<sup>7,3,†</sup>

<sup>1</sup>*Department of Physics, Hefei University of Technology, Hefei, Anhui, China*

<sup>2</sup>*Department of Chemistry and Biochemistry, University of California, Santa Cruz, California, 95064, USA*

<sup>3</sup>*Department of Physics, University of California, Santa Cruz, California, 95064, USA*

<sup>4</sup>*Physics Department, University of Utah, 115 South 1400 East*

<sup>5</sup>*Department of Materials Science and Engineering, Rensselaer Polytechnic Institute, 110 8th Street, Troy, New York 12180, USA*

<sup>6</sup>*Department of Applied Physical Sciences, University of North Carolina, Chapel Hill, NC 27514, North Carolina, United States*

<sup>7</sup>*Department of Materials Science and Engineering, University of Wisconsin-Madison, WI, 53706, USA*

(Dated: October 10, 2023)

## SI. SPIN LIFETIME: SPIN RELAXATION AND DEPHASING

Spin lifetime  $\tau_s$  is calculated based on the method developed in Ref. 1. To define  $\tau_s$ , we follow the time evolution of the total spin observable  $S_i^{\text{tot}}(t)$  and the excess spin observable  $\delta S_i^{\text{tot}}(t)$

$$S_i^{\text{tot}}(t) = \text{Tr}(s_i(t)\rho(t)), \quad (\text{S1})$$

$$\delta S_i^{\text{tot}}(t) = S_i^{\text{tot}}(t) - S_i^{\text{tot,eq}}, \quad (\text{S2})$$

where  $S_i^{\text{tot}}(t)$  is the  $i$ -component of the total spin observable vector  $\mathbf{S}^{\text{tot}}(t)$ ;  $\rho(t)$  is the density matrix;  $s_i$  is spin Pauli matrix in Blöch basis along direction  $i$ ; “eq” corresponds to the final equilibrium state. The time evolution must start at an initial state (at  $t = t_0$ ) with a net spin i.e.  $\delta\rho(t_0) = \rho(t_0) - \rho^{\text{eq}} \neq 0$  such that  $\delta S_i^{\text{tot}}(t_0) \neq 0$ . We evolve the density matrix through the quantum master equation given in Ref. 1 (Eq. 5 therein) for a long enough simulation time, typically from ns to  $\mu$ s, until the evolution of  $\delta S_i^{\text{tot}}(t)$  can be reliably fitted by

$$\delta S_i^{\text{tot}}(t) = \delta S_i^{\text{tot}}(t_0) \exp\left[-\frac{t-t_0}{\tau_{s,i}}\right] \times \cos[\Omega(t-t_0) + \phi] \quad (\text{S3})$$

to extract the spin lifetime,  $\tau_{s,i}$ . Above,  $\Omega$  is oscillation frequency due to energy splitting in general, which under  $\mathbf{B}^{\text{ext}} \neq 0$  would have a magnitude of about  $\mu_B B^{\text{ext}} \bar{g}$ , where  $\bar{g}$  is the weighted averaged  $g$ -factor defined in Eq. 10 in the main text.

In Ref. 1, we have shown that it is suitable to generate the initial spin imbalance by applying a test magnetic field at  $t = -\infty$ , allowing the system to equilibrate with a net spin and then turning it off suddenly at  $t_0$ .

Historically, two types of  $\tau_s$  - spin relaxation time (or longitudinal time)  $T_1$  and ensemble spin dephasing time (or transverse time)  $T_2^*$  were used to characterize the decay of spin ensemble or  $\delta\mathbf{S}^{\text{tot}}(t)$ [2, 3]. Suppose the spins are initially polarized along an external field  $\mathbf{B}^{\text{ext}}$ , if we examine  $\delta\mathbf{S}^{\text{tot}}(t) \parallel \mathbf{B}^{\text{ext}}$ ,  $\tau_s$  is called  $T_1$ ; if examine  $\delta\mathbf{S}^{\text{tot}}(t) \perp \mathbf{B}^{\text{ext}}$ ,  $\tau_s$  is called  $T_2^*$ .

The measurement of  $T_1$  requires longitudinal  $\mathbf{B}^{\text{ext}}$ , which are taken small but large enough to polarize nuclear spins and suppress their contribution to spin decay. At  $\mathbf{B}^{\text{ext}} = 0$ , experimental  $\tau_s$  are usually regarded as  $T_2^*$  ( $B^{\text{ext}} \rightarrow 0$ ) for halide perovskites, because experimental  $\tau_s$  ( $\mathbf{B}^{\text{ext}} = 0$ ) are much shorter than  $T_1$  but comparable to  $T_2^*$  at weak transverse  $\mathbf{B}^{\text{ext}}$ . While our theoretical  $\tau_s$  ( $\mathbf{B}^{\text{ext}} = 0$ ) without considering nuclear spins should be regarded as  $T_1$ .

The ensemble spin dephasing rate  $1/T_2^*$  consists of both reversible and irreversible parts. The reversible part may be removed by the technique of spin echo. The irreversible part is called spin dephasing rate  $1/T_2$ , which must be

<sup>a</sup> JX and KL contributed equally to this work.

\* sundar@rpi.edu

† yping3@wisc.edu

smaller than  $1/T_2^*$ . According to Ref. 3,  $T_2$  may be also defined using Eq. S3 without the need of spin echo but instead of  $S_i^{\text{tot}}(t)$ , we need another quantity - the sum of individual spin amplitudes

$$S_i^{\text{div}} = \sum_k \left| \sum_{mn} s_{i,kmn} \rho_{knm}(t) \right|. \quad (\text{S4})$$

In the case of two Kramers degenerate bands, if we take  $z$  direction along  $\mathbf{B}^{\text{ext}}$ , then  $T_1$  describes the decay of the occupation differences between two bands (the diagonal matrix element of one-particle density matrix  $\rho$ ), while  $T_2$  and  $T_2^*$  describes the decay of the off-diagonal elements of  $\rho$ .

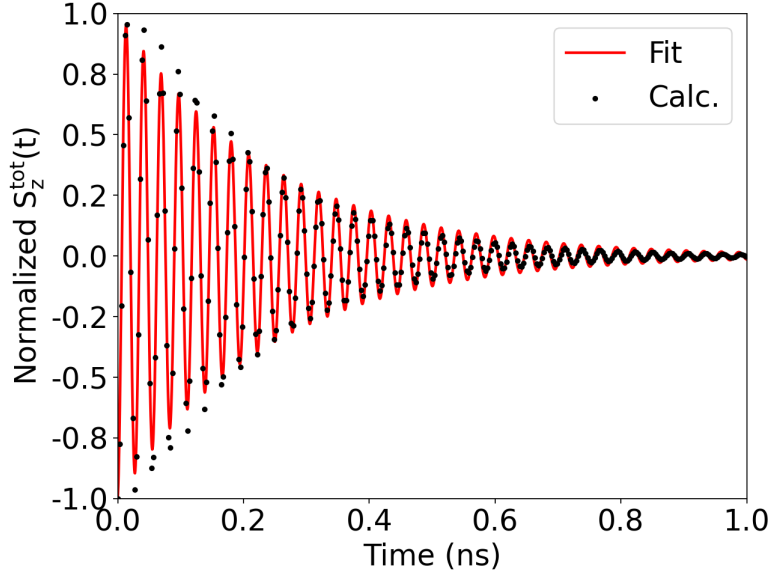

FIG. S1. Time evolution of  $S_z^{\text{tot}}$  of pristine CsPbBr<sub>3</sub> at 4 K under a transverse magnetic field of 1 Tesla  $n_c = 10^{18} \text{ cm}^{-3}$ , after the initial spin imbalance generated by a test magnetic field. “Calc.” denotes calculated  $S_z^{\text{tot}}$ . “Fit” denotes fitted  $S_z^{\text{tot}}$  using Eq. S3.

In Fig. S1, we compare calculated  $S_z^{\text{tot}}$  and fitted ones using Eq. S3 of pristine CsPbBr<sub>3</sub> at 4 K under a transverse magnetic field of 1 Tesla, after the initial spin imbalance generated by a test magnetic field. We find the fitted curve matches the calculated one perfectly after 0.2 ns, which gives spin lifetime  $\tau_{s,i}$  and the Larmor precession frequency  $\Omega$  through Eq. S3.

## SII. COMPUTATIONAL DETAILS

The ground-state electronic structure, phonon, as well as electron-phonon and electron-impurity matrix elements are firstly calculated using Density Functional Theory (DFT), with relatively coarse  $k$  and  $q$  meshes in the plane-wave DFT code JDFTx[4]. We use Perdew–Burke–Ernzerhof exchange–correlation functional[5]. The structures are fully optimized and the lattice constants are 8.237, 8.514 and 11.870 Å. The phonon calculations employ  $2 \times 2 \times 1$  supercells through finite difference calculations. We use Optimized Norm-Conserving Vanderbilt (ONCV) pseudopotentials[6] with self-consistent spin-orbit coupling throughout, where we find convergence at a wavefunction kinetic energy cutoff of 48 Ry.

The e-i matrix  $g^i$  between state  $(k, n)$  and  $(k', n')$  is

$$g_{kn, k'n'}^i = \langle kn | \Delta V^i | k'n' \rangle, \quad (\text{S5})$$

$$\Delta V^i = V^i - V^0, \quad (\text{S6})$$

where  $V^i$  is the potential of the impurity system and  $V^0$  is the potential of the pristine system.  $V^i$  is computed with SOC using a  $2 \times 2 \times 1$  supercell with a neutral impurity. To speed up the supercell convergence, we used the potential alignment method developed in Ref. 7.

We then transform all quantities from plane wave basis to maximally localized Wannier function basis, and interpolate them to substantially finer  $k$  and  $q$  meshes[8–10]. The Wannier interpolation approach fully accounts for polar terms in the e-ph matrix elements and phonon dispersion relations, using the approach developed by Verdi and Giustino[11]. The Born effective charges and electronic dielectric constants are calculated from open-source code QuantumESPRESSO[12]. The e-e scattering matrix is computed using the same method given in Ref. 1 with the macroscopic static dielectric constant about 36 computed from density functional perturbation theory (DFPT)[13] in QuantumESPRESSO. The simulations of Born effective charge  $Z^*$ , high-frequency dielectric constant  $\epsilon_\infty$ , and low-frequency dielectric constant  $\epsilon_0$  employ the commonly-used method developed in Ref. 13 based on Density-Functional Perturbation Theory, implemented in QuantumESPRESSO. The fine  $k$  and  $q$  meshes are  $48 \times 48 \times 32$  for simulations at 300 K and are finer at lower temperature, e.g.,  $180 \times 180 \times 120$  for simulations at 4 K. The computation of e-i and e-e matrix elements and the real-time dynamics simulations are done with the DMD code (Density-Matrix Dynamics), interfaced with the JDFTx-code. The energy-conservation smearing parameter  $\sigma$  is chosen to be comparable or smaller than  $k_B T$  for each calculation.

### SIII. THE BAND STRUCTURE AND PHONON DISPERSION

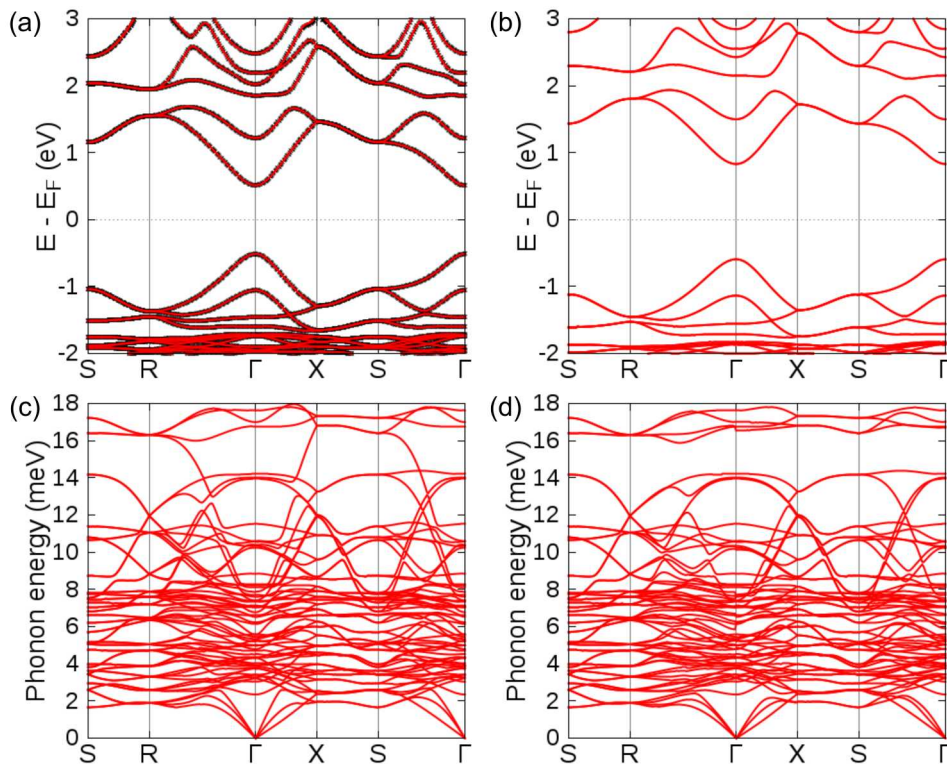

FIG. S2. (a) The band structure of CsPbBr<sub>3</sub> from DFT calculation with PBE functional and spin-orbit coupling (red) and from Wannierization (black), with the Fermi level being aligned to 0. (b) The band structure of CsPbBr<sub>3</sub> from DFT calculation with EV93PW91 functional. Phonon dispersion of CsPbBr<sub>3</sub> (c) without and (d) with considering LO-TO splitting with PBE functional. Our phonon dispersion is in good agreement with previous theoretical one reported in Ref. 14.

Figure S2a shows a direct band gap of CsPbBr<sub>3</sub> at  $\Gamma$ , suggesting that spin relaxation is important at  $\Gamma$  where carriers occupy first. The perfect overlap between the DFT band structure and Wannier band structure implies good Wannierization quality. The band structure simulated using EV93PW91 functional is shown in Fig. S2b and gives a larger band gap than PBE in Fig. S2a.

By comparing the phonon dispersion of CsPbBr<sub>3</sub> at PBE without LO-TO splitting (Fig. S2c) to that with LO-TO splitting (Fig. S2d), we found that the long-range dipole potential field strongly splits the optical modes near 14 meV at  $\Gamma$ . This gives rise to  $\sim 2$  meV blueshift of the No. 57 optical mode within the 60 modes in total. The No. 57 (O57) and No. 58 (O58) optical modes were found to play significant roles in carrier relaxation. The corresponding discussion can be found from section “Analysis of spin-phonon relaxation” in the main text.

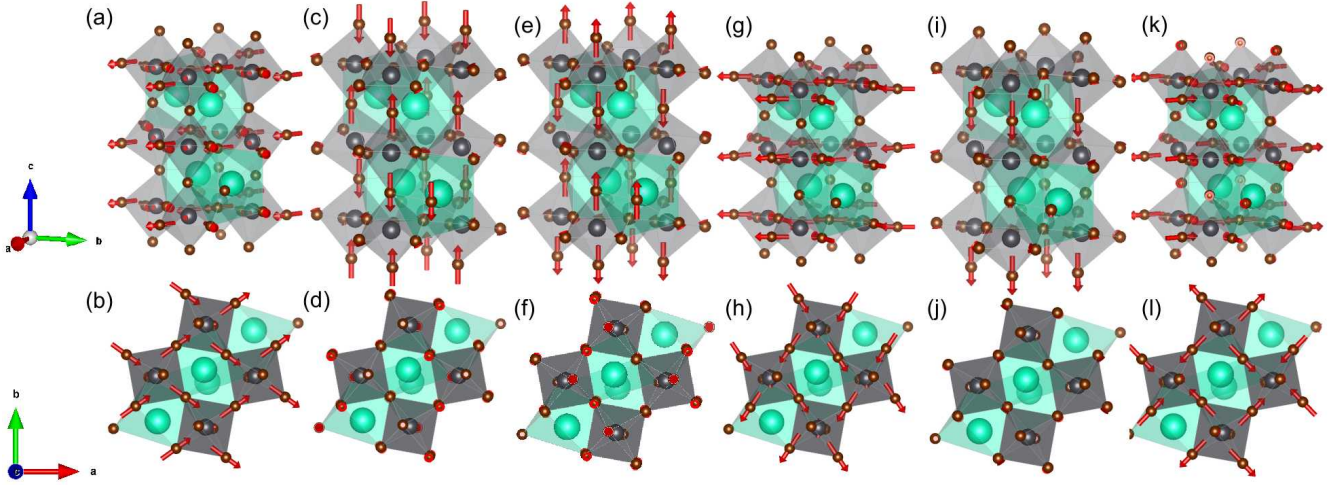

FIG. S3. Visualization of the  $\text{CsPbBr}_3$  phonon modes with LO-TO splitting. Phonon modes (a)-(b) O57 and (c)-(d) O58 when  $\mathbf{q} = (0.001, 0, 0)$   $\text{\AA}^{-1}$ , (e)-(f) O57 and (g)-(h) O58 when  $\mathbf{q} = (0, 0.001, 0)$   $\text{\AA}^{-1}$ , and (i)-(j) O57 and (k)-(l) O58 when  $\mathbf{q} = (0, 0, 0.001)$   $\text{\AA}^{-1}$ . The red arrows represent the phonon displacement vectors.

In terms of the symmetry, bulk  $\text{CsPbBr}_3$  belongs to  $Pnma$  space group ( $D_{2h}^{16}$ ). By visualizing the displacement patterns as shown in Fig. S3, O57 and O58 phonon modes transform as  $B_{3g}$  and  $B_{2g}$ , respectively. And both of them are Raman-active based on symmetry.

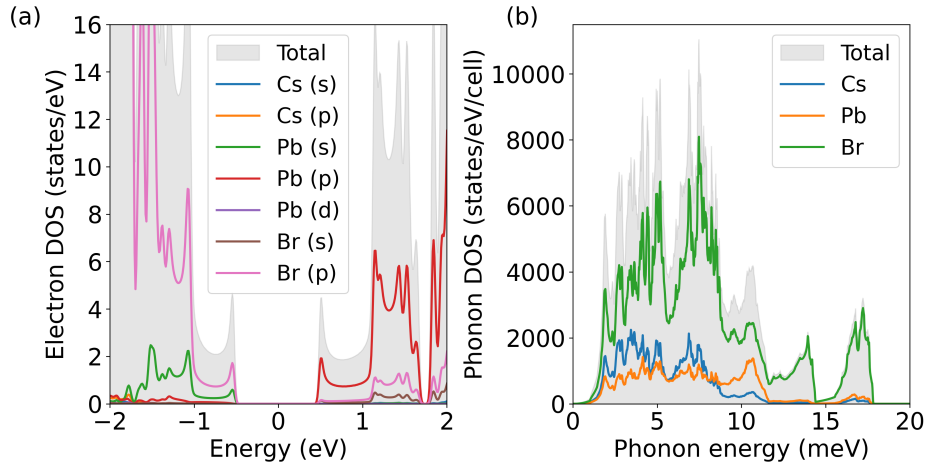

FIG. S4. (a) Electronic projected density of states (DOS) and (b) phonon projected density of states of  $\text{CsPbBr}_3$ .

#### SIV. THE BENCHMARK OF ORBITAL ANGULAR MOMENTUM L IMPLEMENTATION

To verify our implementation of orbital angular momentum, we did benchmark calculations of single-band orbital angular momentum and  $g$ -factor of A and B excitons of monolayer  $\text{MoS}_2$ . We find that our results (Table S1) are in good agreement with previous theoretical and experimental results[15–17].

|               | This work | Theory 1 | Theory 2 | Exp. 1 |
|---------------|-----------|----------|----------|--------|
| $L_{z,K,v-1}$ | 4.09      | 3.72     | 3.94     |        |
| $L_{z,K,v-1}$ | 4.30      | 3.93     | 4.10     |        |
| $L_{z,K,c}$   | 2.06      | 2.09     | 1.98     |        |
| $L_{z,K,c+1}$ | 1.84      | 1.87     | 1.76     |        |
| $g_A$         | -4.48     | -3.68    | -4.24    | -4.6   |
| $g_B$         | -4.50     | -3.70    | -4.36    | -4.3   |

TABLE S1. The benchmark of orbital angular momentum and  $g$  factors of monolayer MoS<sub>2</sub>.  $L_{z,K,n}$  is the single-band orbital angular momentum along  $z$  direction of band  $n$  at high-symmetry  $\mathbf{k}$ -point  $K$ , which is the diagonal element of  $\mathbf{L}_{z,K}$  matrix.  $v$  and  $c$  denote the highest valence and lowest conduction bands respectively.  $g_A$  and  $g_B$  are  $g$ -factor of A and B excitons respectively. The theoretical  $g_A$  and  $g_B$  shown here are computed without considering excitonic effects and  $g_A = 2(L_{K,c+1} - L_{K,v})$  and  $g_B = 2(L_{K,c} - L_{K,v-1})$  (see Ref. 15). Theory 1 and 2 are theoretical results from Ref. 15 and 16 respectively. Exp. 1 are experimental data from Ref. 17.

### SV. $V_{xc}$ -DEPENDENCE OF $g$ -FACTOR AND ANOTHER $g$ -FACTOR DEFINITION

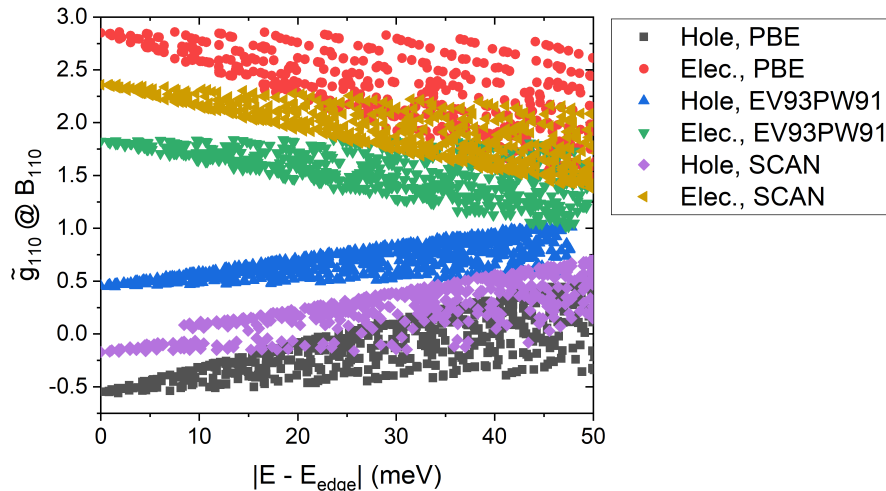

FIG. S5. The  $\mathbf{k}$ -dependent  $g$ -factor  $\tilde{g}_k$  for magnetic fields along [110] direction (Eq. 8 and 9 in Method Section of the main text) computed using different exchange-correlation functionals ( $V_{xc}$ ) at  $\mathbf{k}$ -points around the band edges. Each data point corresponds to a  $\mathbf{k}$  point. The functional EV93PW91 uses the Engel–Vosko exchange functional[18] and the correlation part of PW91 GGA functional. The SCAN or “strongly constrained and appropriately normed” functional is a meta-GGA functional developed by Sun et al.[19]

The accurate prediction of  $g$ -factor requires accurate electronic structure as inputs, therefore we examine  $g$ -factors using DFT states from different exchange-correlation functionals ( $V_{xc}$ ). In Fig. S5, we show  $\mathbf{k}$ -dependent  $g$ -factor  $\tilde{g}_k$  calculated using three different  $V_{xc}$  - PBE, SCAN and EV93PW91. PBE as a GGA functional and SCAN as a meta-GGA functional were commonly employed in the DFT calculations. EV93PW91 was known to improve band gap values compared with local or semi-local functionals[20]. We found that EV93PW91 predicted a better band gap of about 1.42 eV (see the EV93PW91 band structure in Fig. S2(b)), compared with the PBE one with a band gap of 1.03 eV in Fig. S2(a), and the SCAN one with a value of 1.18 eV (the experimental one is at 2.36 eV[21]). EV93PW91 predicted the electron effective mass of about  $0.27m_e$ , improved over PBE at  $0.22m_e$  and SCAN at  $0.24m_e$  respectively, against the experimental one at  $0.26m_e$ [14].

From Fig. S5, we find that for all  $V_{xc}$ , the calculated electron  $\tilde{g}_k$  are larger than hole  $\tilde{g}_k$  and the sums of electron and hole  $\tilde{g}_k$  range from 1.85 to 2.4, in agreement with experiments[22, 23]. More importantly, for all  $V_{xc}$ ,  $\tilde{g}_k$  of electrons and holes decrease and increase with state energy respectively, the fluctuation of  $\tilde{g}_k$  increases with the state energy

and the  $g$ -factor fluctuation amplitudes  $\Delta\tilde{g}$  are of the same order of magnitude.

However, both electron and hole  $\tilde{g}_k$  are found sensitive to  $V_{xc}$ ; in particular, the signs of hole  $\tilde{g}_k$  are different among different  $V_{xc}$ . Overall, we find that the magnitudes of  $g$ -factors predicted by EV93PW91 are in the best agreement with experiments. EV93PW91 predicts electron  $g$ -factor  $\sim 1.8$  and hole  $\sim 0.5$  at  $\Gamma$  respectively, close to experimental data[23] (1.69-2.06 for electrons and 0.65-0.85 for holes). On the other hand, both PBE[5] and SCAN[19] functionals overestimate electron  $g$ -factor and underestimate hole  $g$ -factor compared with experimental values[22, 23]. Furthermore, the anisotropy of hole  $g$ -factor along three crystal directions is found greater than that of electron, in agreement with experiments[23]. With EV93PW91, the theoretical anisotropy ratio  $P$  of electron and hole  $g$ -factors at  $\Gamma$  are 6% and 15% respectively, in reasonable agreement with experiments (10% for e and 13% for h)[23], where  $P = |g_{max} - g_{min}| / |g_{max} + g_{min}|$  with  $g_{max}$  ( $g_{min}$ ) the maximum (minimum) value of  $g$ -factors among three directions.

The strong  $V_{xc}$ -dependence of  $g$ -factors indicate that accurate electronic structure is important for quantitative comparison of  $g$ -factor with experiments. Therefore, to reliably predict the  $g$ -factor values, we may need to employ a higher level of theory, such as the GW approximation[16, 24], to improve the electronic structure description and lessen such dependence on the choice of DFT  $V_{xc}$ . On the other hand,  $T_2^*$  only depends on  $\Delta\tilde{g}$ , which are less sensitive to  $V_{xc}$ , e.g.,  $\Delta\tilde{g}$  by the SCAN functional[19] is  $\sim 80\%$  of that by PBE. Moreover, the trends of  $g$ -factors and  $\Delta\tilde{g}$  versus electronic energies are the same for different  $V_{xc}$ . Therefore, we expect that different  $V_{xc}$  predict similar magnitudes of  $T_2^*$  and the same trends of  $T_2^*$  versus external conditions.

Below, we provide a more general definition of  $g$ -factor and its fluctuation amplitude, which is more appropriate when spin directions (at different  $\mathbf{k}$ ) are not parallel to the direction of the applied  $\mathbf{B}^{\text{ext}}$ , and materials are highly anisotropic.

Generally speaking, except at some high-symmetry  $\mathbf{k}$ -points,  $\mathbf{L}$  and  $\mathbf{L} + g_0\mathbf{S}$  may not be proportional to  $\mathbf{S}$ . Since under finite  $\mathbf{B}^{\text{ext}}$ , the expectation value vectors of  $\mathbf{L} + g_0\mathbf{S}$  must be parallel to  $\mathbf{B}^{\text{ext}}$  (in the first-order perturbation level), spin expectation value vectors may not be parallel to  $\mathbf{B}^{\text{ext}}$ . Therefore, it is helpful to define a vector of Larmor precession frequency whose magnitude is equal to the energy splitting,

$$\vec{\Omega}_k(\mathbf{B}^{\text{ext}}) = \Delta E_k(\mathbf{B}^{\text{ext}}) \hat{S}_{kh}^{\text{exp}}(\widehat{\mathbf{B}^{\text{ext}}}), \quad (\text{S7})$$

$$\hat{S}_{k,h}^{\text{exp}}(\widehat{\mathbf{B}^{\text{ext}}}) = \vec{S}_{k,h}^{\text{exp}}(\widehat{\mathbf{B}^{\text{ext}}}) / \left| \vec{S}_{k,h}^{\text{exp}}(\widehat{\mathbf{B}^{\text{ext}}}) \right|, \quad (\text{S8})$$

where  $\vec{S}_{kh}^{\text{exp}}(\widehat{\mathbf{B}^{\text{ext}}})$  is the spin expectation value vector.

With the distribution of  $\vec{\Omega}_k$ , we can define a  $g$ -factor vector and a more appropriate  $g$ -factor fluctuation amplitude for spin dephasing.

With  $\vec{\Omega}_k$ , we can define a  $g$ -factor vector (with  $C^{S \rightarrow J}$  defined in the main text) as

$$\vec{g}_k^\Omega(\widehat{\mathbf{B}^{\text{ext}}}) = C^{S \rightarrow J} \frac{\vec{\Omega}_k(\mathbf{B}^{\text{ext}})}{\mu_B B^{\text{ext}}}. \quad (\text{S9})$$

With  $\vec{g}_k^\Omega(\hat{x})$ ,  $\vec{g}_k^\Omega(\hat{y})$  and  $\vec{g}_k^\Omega(\hat{z})$ , we will obtain a  $g$ -factor tensor.

A more appropriate definition of  $g$ -factor fluctuation amplitude for spin dephasing requires the detailed knowledge of  $\vec{\Omega}_k$ . Suppose the total excited or excess spin  $\delta\mathbf{S}^{\text{tot}}$  is perpendicular to  $\mathbf{B}^{\text{ext}}$ , i.e.,  $\delta\mathbf{S}^{\text{tot}} \perp \widehat{\mathbf{B}^{\text{ext}}}$ , then without considering the EY spin relaxation,  $\tau_s$  will be mainly determined by  $\Delta\Omega_{\perp\delta\mathbf{S}^{\text{tot}}}$  - the fluctuation amplitude of  $\vec{\Omega}_{\perp\delta\mathbf{S}^{\text{tot}}}$ , which is the component of  $\vec{\Omega}$  perpendicular to  $\delta\mathbf{S}^{\text{tot}}$ . [2, 25] Suppose the unit vectors  $\hat{e}_1$ ,  $\hat{e}_2$  and  $\hat{e}_3$  orthogonal among each other, then similar to Eq. 11 in the main text, we can define  $\Delta\Omega_{\perp\hat{e}_1}$  as

$$\Delta\Omega_{\perp\hat{e}_1} = \sqrt{(\Delta\Omega_{\hat{e}_2})^2 + (\Delta\Omega_{\hat{e}_3})^2}, \quad (\text{S10})$$

$$\Delta\Omega_{\hat{e}} = \sqrt{\frac{\sum_k (-f'_k) |\Omega_{k,\hat{e}} - \overline{\Omega}_{\hat{e}}|^2}{\sum_k (-f'_k)}}, \quad (\text{S11})$$

$$\overline{\Omega}_{\hat{e}} = \frac{\sum_k (-f'_k) \Omega_{k,\hat{e}}}{\sum_k (-f'_k)}, \quad (\text{S12})$$

where  $\Omega_{\hat{e}}$  is the  $\hat{e}$  component of  $\vec{\Omega}$ . As  $\delta\mathbf{S}^{\text{tot}}$  is approximated rotating about  $\widehat{\mathbf{B}^{\text{ext}}}$ ,  $\vec{\Omega}_{\perp\delta\mathbf{S}^{\text{tot}}}$  changes with time. Suppose the unit vectors  $\hat{e}_a$  and  $\hat{e}_b$  satisfy  $\hat{e}_a \perp \hat{e}_b$ ,  $\hat{e}_a \perp \widehat{\mathbf{B}^{\text{ext}}}$  and  $\hat{e}_b \perp \widehat{\mathbf{B}^{\text{ext}}}$ , we can define an effective fluctuation

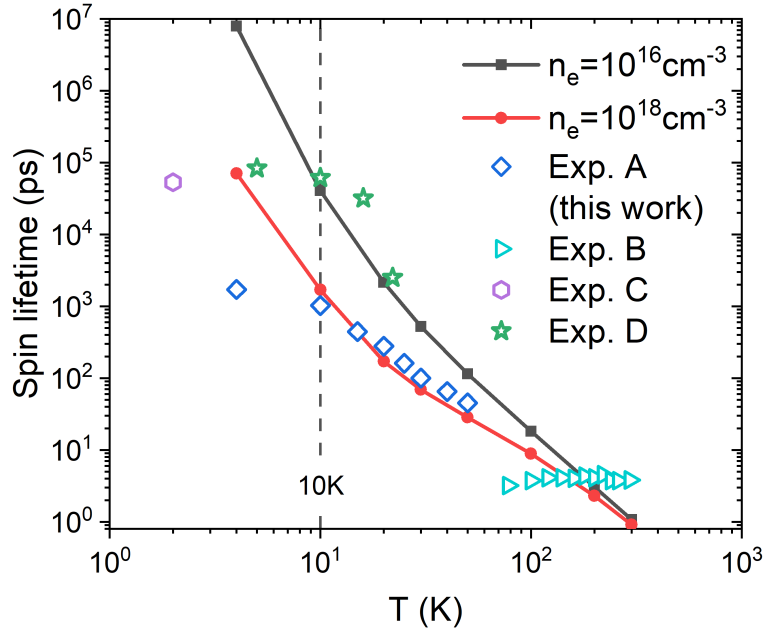

FIG. S6. Spin lifetime  $\tau_s$  of CsPbBr<sub>3</sub> electrons due to both e-ph and e-e scatterings calculated as a function of  $T$  at different electron densities  $n_e$  compared with experimental data. The data points are the same as those in Fig. 1a in the main text but here we use log-scale for both  $y$ - and  $x$ -axes to highlight low- $T$  region. The meanings of Exp. A, B, C and D are the same as in Fig. 1a in the main text.

amplitude of  $\vec{\Omega}(\mathbf{B}^{\text{ext}})$  as

$$\begin{aligned} \Delta\Omega(\mathbf{B}^{\text{ext}}) &= \sqrt{\frac{(\Delta\Omega_{\perp\hat{e}_a})^2 + (\Delta\Omega_{\perp\hat{e}_b})^2}{2}} \\ &= \sqrt{(\Delta\Omega_{\widehat{\mathbf{B}^{\text{ext}}}})^2 + \frac{1}{2}(\Delta\Omega_{\hat{e}_a})^2 + \frac{1}{2}(\Delta\Omega_{\hat{e}_b})^2}. \end{aligned} \quad (\text{S13})$$

With  $\Delta\Omega(\mathbf{B}^{\text{ext}})$ , we can define a  $T$  and  $\mu_c$  dependent effective fluctuation amplitude of  $g$ -factor under  $\mathbf{B}^{\text{ext}}$ ,

$$\Delta g^\Omega(\widehat{\mathbf{B}^{\text{ext}}}) = \frac{\Delta\Omega(\mathbf{B}^{\text{ext}})}{\mu_B B^{\text{ext}}}. \quad (\text{S14})$$

For CsPbBr<sub>3</sub>, we find Eq. S14 predicts quite similar values to those by Eq. 11 in the main text (differences are not greater than 10%).

## SVI. SPIN RELAXATION TIMES

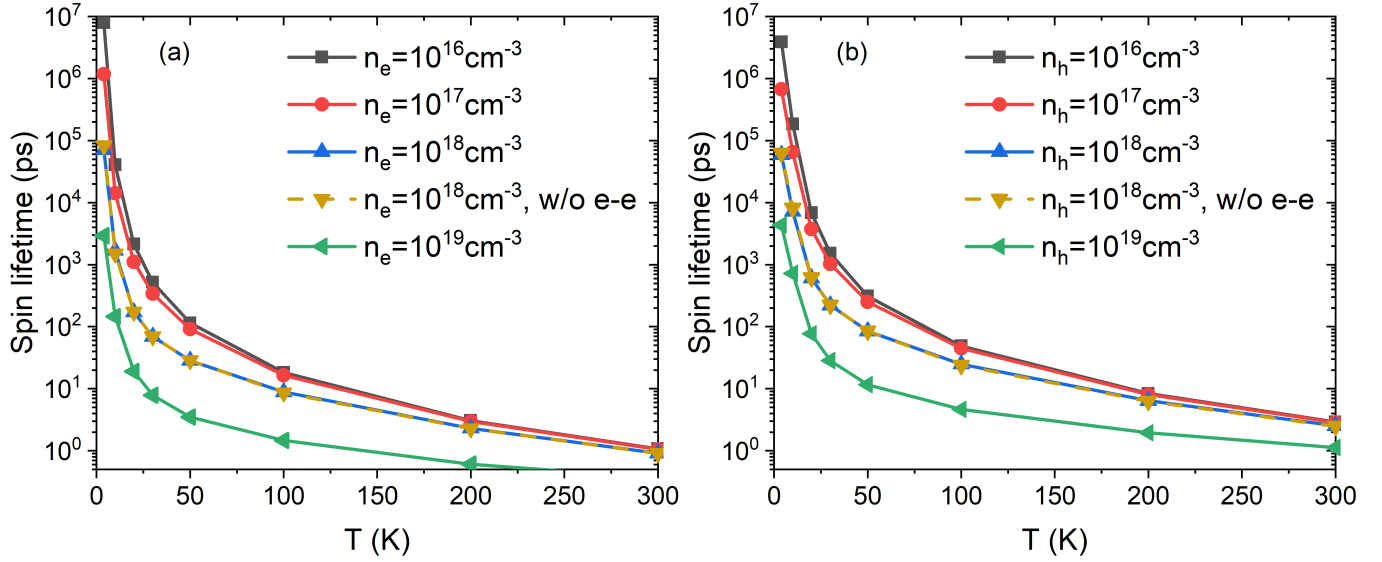

FIG. S7. (a) Electron and (b) hole  $\tau_s$  of pristine CsPbBr<sub>3</sub> as a function of  $T$  at different carrier density  $n_c$  including both electron-phonon and electron-electron scatterings. The brown triangle lines represent  $\tau_s$  without electron-electron (w/o e-e) scatterings.

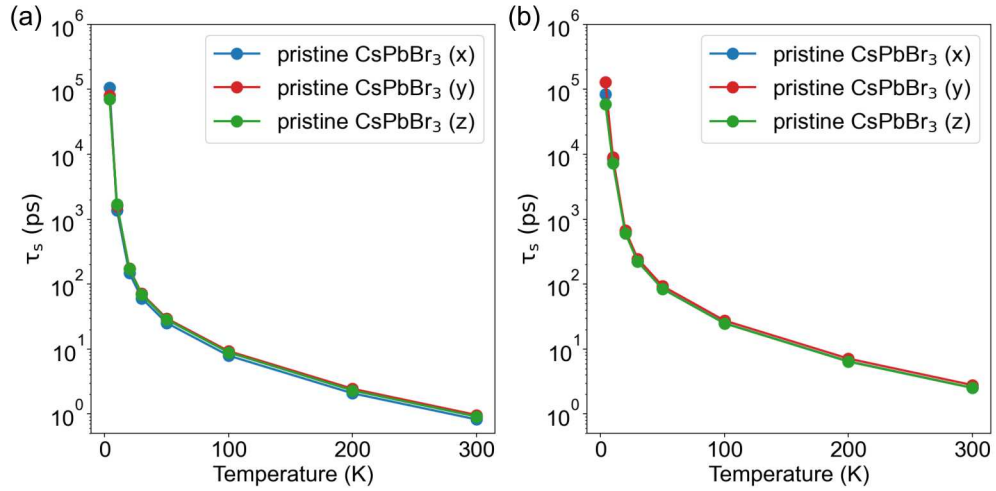

FIG. S8. (a) Electron and (b) hole  $\tau_s$  of pristine CsPbBr<sub>3</sub> along  $x$ ,  $y$  and  $z$  Cartesian directions with carrier density  $n_c = 10^{18} \text{ cm}^{-3}$  as a function of temperature.

In Fig. S8, we show electron and hole  $\tau_s$  of pristine CsPbBr<sub>3</sub> along  $x$ ,  $y$  and  $z$  directions and we find both of them are nearly isotropic.



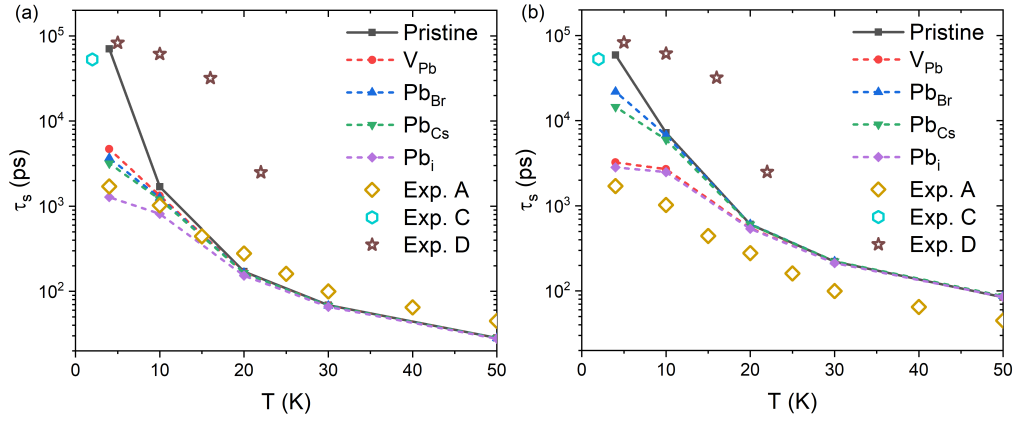

FIG. S9. Spin lifetime  $\tau_s$  of (a) electrons and (b) holes in CsPbBr<sub>3</sub> calculated with and without neutral impurities at density of  $10^{18} \text{ cm}^{-3}$  compared with experiments. Here carrier density  $n_c$  is at  $10^{18} \text{ cm}^{-3}$ .  $V_{\text{Pb}}$  denotes Pb vacancy;  $\text{Pb}_{\text{Br}}$  and  $\text{Pb}_{\text{Cs}}$  denote Pb substitution of Br or Cs atoms;  $\text{Pb}_i$  denotes an extra Pb atom at an interstitial site.

Fig. S9 shows the effects of impurity scattering on  $\tau_s$  at  $\mathbf{B}^{\text{ext}} = 0$  as a function of  $T$ , with four representative Pb-related defects/impurities (see the results of other impurities below in Fig. S10). We found that even with a high impurity density  $n_i = 10^{18} \text{ cm}^{-3}$ , which is within the experimental range of  $10^{14} \sim 10^{20} \text{ cm}^{-3}$  [26–28], impurity effects are negligible at  $T \geq 20 \text{ K}$ . At lower  $T$ , however the presence of impurities reduces  $\tau_s$ , consistent with EY mechanism, and leads to a weaker  $T$ -dependence of  $\tau_s$  (as the e-i scattering is  $T$ -independent). Moreover, we found that the contribution of e-i scatterings depends on the specific chemical composition of impurity, and the same defect affects differently for the electron and hole  $\tau_s$  (Fig. S9). Overall, we emphasize that the quantitative description of impurity effect requires explicit atomistic simulations of impurities, given the large variation among them. They are only important at relatively low temperature  $T < 20 \text{ K}$ , with relatively high  $n_i$  (e.g.,  $> 10^{18} \text{ cm}^{-3}$ ).

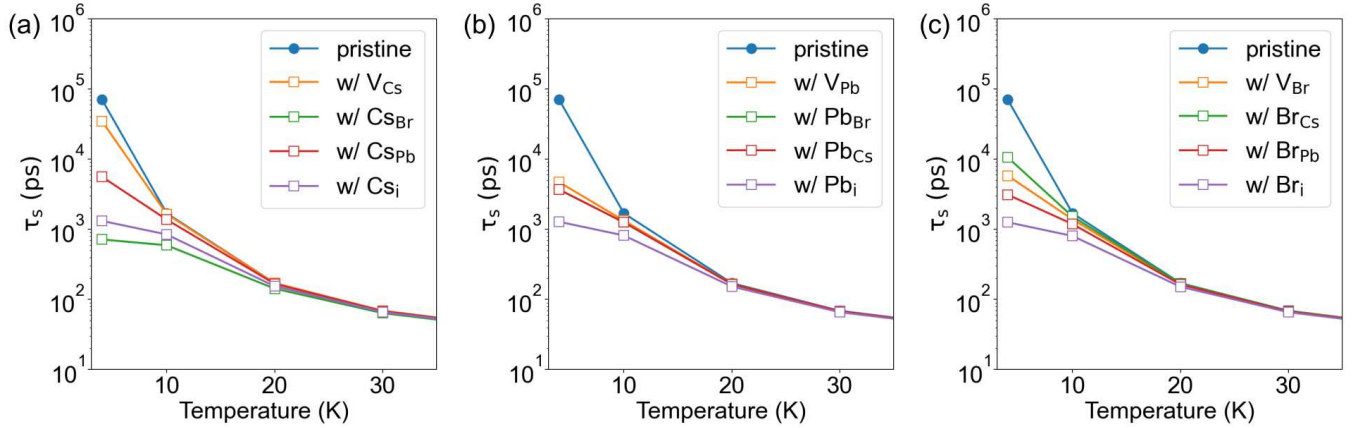

FIG. S10. Electron  $\tau_s$  of CsPbBr<sub>3</sub> with different types of point defects/impurities. Both electron carrier density  $n_e$  and impurity density  $n_i$  are  $10^{18} \text{ cm}^{-3}$ . (a) With neutral Cs-derived impurities, where  $V_{\text{Cs}}$  denotes Cs vacancy;  $\text{Cs}_{\text{Br}}$  denotes Cs substitution of Br;  $\text{Cs}_{\text{Pb}}$  denotes Cs substitution of Pb;  $\text{Cs}_i$  denotes interstitial Cs doping. (b) With neutral Pb-derived impurities. (c) With neutral Br-derived impurities.

From Fig. S10, we find that the impurity effects are sensitive to the atomistic details of impurities, but all impurities studied here cannot affect  $\tau_s$  at  $T \geq 20 \text{ K}$  if impurity density  $n_i$  is not extremely high (e.g.  $< 10^{18} \text{ cm}^{-3}$ ).

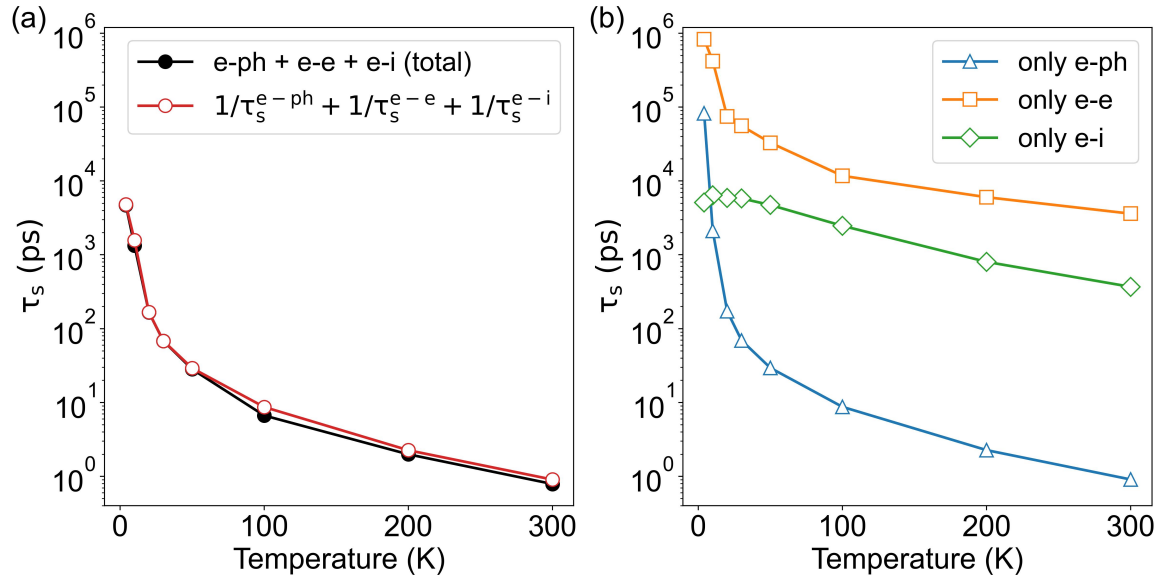

FIG. S11. (a) Electron  $\tau_s$  of CsPbBr<sub>3</sub> from real-time dynamics including all of the electron-phonon (e-ph), electron-electron (e-e) and electron-impurity (e-i) scatterings (black line), and that evaluated by using the equation  $1/\tau_s = 1/\tau_s^{e-ph} + 1/\tau_s^{e-e} + 1/\tau_s^{e-i}$ . (b) Electron  $\tau_s$  of CsPbBr<sub>3</sub> due to each of the e-ph, e-e and e-i scatterings. Both electron carrier density  $n_e$  and impurity density  $n_i$  are  $10^{18} \text{ cm}^{-3}$ . Impurity  $V_{\text{Pb}}$  is considered in the e-i scattering.

Fig. S11(a) shows that the total  $\tau_s$  decreases when the scatterings are stronger (higher temperature and adding e-i scattering), indicating that EY mechanism is the major mechanism of bulk CsPbBr<sub>3</sub> (in absence of external B field). Furthermore,  $\tau_s$  evaluated by using the equation  $1/\tau_s = 1/\tau_s^{e-ph} + 1/\tau_s^{e-e} + 1/\tau_s^{e-i}$  is nearly the same as that from the real-time dynamics simulation including all the scatterings. In this circumstance, we can separate the causes of spin relaxation into e-ph, e-e, and e-i scatterings as shown in Fig. S11(b).  $\tau_s$  due to e-e scattering is the longest compared to those due to e-ph and e-i scatterings, so that it can be ignored. At  $T > 10\text{K}$ , the e-ph scattering is the strongest scattering channel because the excitation of phonons is considerable, as a result,  $\tau_s$  due to the e-ph scattering is the shortest. When  $T = 4\text{K}$ , there are less phonons excited, so that with a high impurity density  $n_i$ , the e-i scattering dominates spin relaxation.  $\tau_s^{e-i}$  is weakly temperature-dependent. This weak dependence is due to temperature broadening effects and the temperature dependence of the chemical potential with a fixed carrier density.

## SVII. CARRIER AND SPIN TRANSPORT PROPERTIES IN LOW DENSITY LIMIT

We calculate the electron mobility  $\mu_e$  and the hole mobility  $\mu_h$  by solving the linearized Boltzmann equation in relaxation-time approximation[29–32],

$$\mu_{e(h),i} = \frac{e}{n_{e(h)} V N_k} \sum_{k,n \in \text{CB(VB)}} \frac{df}{d\epsilon} \Big|_{\epsilon=\mu_F} v_{kn,i}^2 \tau_{m,kn}, \quad (\text{S15})$$

where  $i = x, y, z$  for three dimensional systems.  $N_k$  is the number of  $k$  points.  $V$  is the unit cell volume.  $n_e$  and  $n_h$  are electron and hole density respectively. CB and VB denote conduction and valence bands, respectively.  $f$  is Fermi-Dirac function.  $\mu_F$  is the chemical potential.  $v$  is the band velocity.  $\tau_m$  is the momentum relaxation time. Using the Matthiessen's rule, we have

$$\tau_{m,kn}^{-1} = \left(\tau_{m,kn}^{e-ph}\right)^{-1} + \left(\tau_{m,kn}^{e-i}\right)^{-1} + \left(\tau_{m,kn}^{e-e}\right)^{-1}, \quad (\text{S16})$$

where  $\tau_m^{e-ph}$ ,  $\tau_m^{e-i}$  and  $\tau_{m,kn}^{e-e}$  are the electron-phonon, electron-impurity and electron-electron momentum relaxation times, respectively, which read[1, 29–32]

$$(\tau_{m,kn}^c)^{-1} = \frac{1}{N_k} \sum_{k'n'} (\tau_{kn \rightarrow k'n'}^c)^{-1} (1 - \cos\theta_{k'n'kn}), \quad (\text{S17})$$

$$(\tau_{kn \rightarrow k'n'}^{e-ph})^{-1} = \frac{2\pi}{\hbar} \sum_{\lambda \pm} |g_{k'n',kn}^{k'-k,\lambda}|^2 (n_{k'-k,\lambda} + 0.5 \mp (0.5 - f_{k'n'})) \delta(\epsilon_{k'n'} - \epsilon_{kn} \mp \hbar\omega_{k'-k,\lambda}), \quad (\text{S18})$$

$$(\tau_{kn \rightarrow k'n'}^{e-i})^{-1} = n_i V \frac{2\pi}{\hbar} |g_{k'n',kn}^i|^2 \delta(\epsilon_{k'n'} - \epsilon_{kn}), \quad (\text{S19})$$

$$(\tau_{kn \rightarrow k'n'}^{e-e})^{-1} = \frac{2\pi}{\hbar} \sum_{k_3 n_3 k_4 n_4} \left\{ \begin{array}{l} |g_{kn,k_3 n_3, k'n', k_4 n_4}|^2 \delta_{k+k_3-k'-k_4} \\ \times \left[ \begin{array}{l} f_{k'n'}^{\text{eq}} f_{k_4 n_4}^{\text{eq}} (1 - f_{k_3 n_3}^{\text{eq}}) + \\ (1 - f_{k'n'}^{\text{eq}}) f_{k_3 n_3}^{\text{eq}} (1 - f_{k_4 n_4}^{\text{eq}}) \end{array} \right] \\ \times \delta(\epsilon_{kn} + \epsilon_{k_3 n_3} - \epsilon_{k'n'} - \epsilon_{k_4 n_4}) \end{array} \right\} \quad (\text{S20})$$

$$\cos\theta_{k'n'kn} = \frac{\vec{v}_{k'n'} \cdot \vec{v}_{kn}}{|\vec{v}_{k'n'}| |\vec{v}_{kn}|}, \quad (\text{S21})$$

where  $c$  represents  $e - e$ ,  $e - ph$ , or  $e - e$ ;  $g_{k'n',kn}^{k'-k,\lambda}$  is the e-ph matrix element between state  $(k', n')$  and state  $(k, n)$  with phonon mode  $\lambda$ ; and  $g_{k'n',kn}^i$  is the e-i matrix element defined in Eq. S5 and computed with DFT supercells with neutral impurities.  $n_{k'-k,\lambda}$  is the phonon occupation number.  $g_{k_1 n_1, k_3 n_3, k_2 n_2, k_4 n_4}$  is the e-e matrix element defined in Eq. A6 in Ref. 1.  $f_{kn}^{\text{eq}}$  is the equilibrium occupation of electronic state  $(k, n)$ .

We compute spin diffusion length  $l_s$  for  $z$ -direction spin transport and spin polarization using the relation[25]  $l_s = \sqrt{D\tau_s}$ , where  $D$  is diffusion coefficient.  $D$  can be estimated using the general form of Einstein relation[33]  $D = \mu_c n_c / \frac{dn_c}{d\mu_{F,c}}$ , where  $\mu_c$  is the free-carrier mobility,  $\mu_{F,c}$  is the chemical potential, and  $n_c$  is the carrier density.

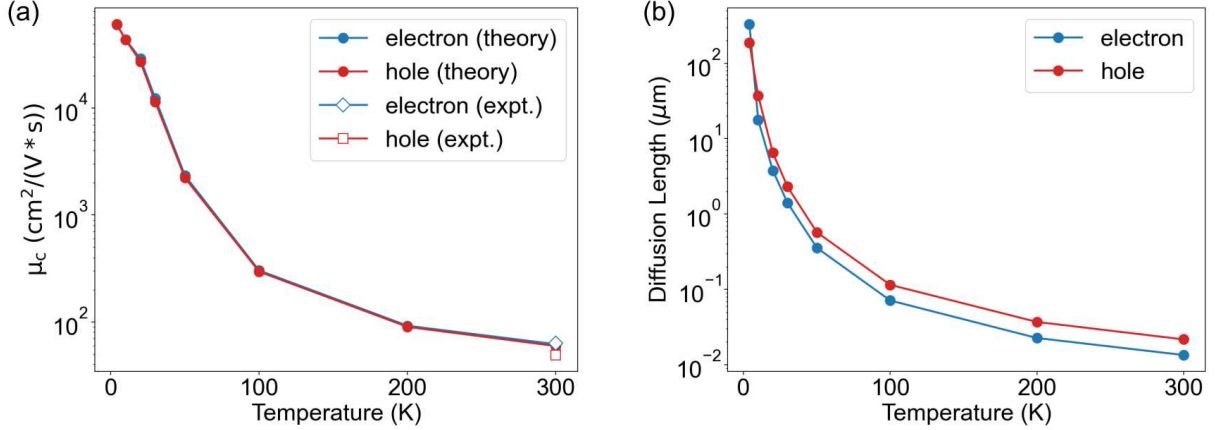

FIG. S12. Calculated mobility  $\mu_c$  (a) and spin diffusion length  $l_s$  (b) of electrons of pristine CsPbBr<sub>3</sub> in low density limit as a function of temperature. “expt.” denotes experimental data from Ref. [34].

Fig. S12 shows calculated mobility  $\mu_c$  and spin diffusion length  $l_s$  of electrons of pristine CsPbBr<sub>3</sub> in low density limit (here  $n_c$  is taken as  $10^{14} \text{ cm}^{-3}$ ), which set the upper bounds of  $\mu_c$  and  $l_s$ . Considering that there are no impurities and the e-e scattering is not active in low density limit, only the e-ph scattering contributes here. From Fig. S12a and b, we find that both  $\mu_c$  and  $l_s$  increase fast with decreasing  $T$  and can reach very high values at low  $T$ , e.g.,  $l_s$  can be as long as hundreds of  $\mu\text{m}$  at 4 K.

SVIII. MAGNETIC-FIELD EFFECTS ON  $\tau_s$ 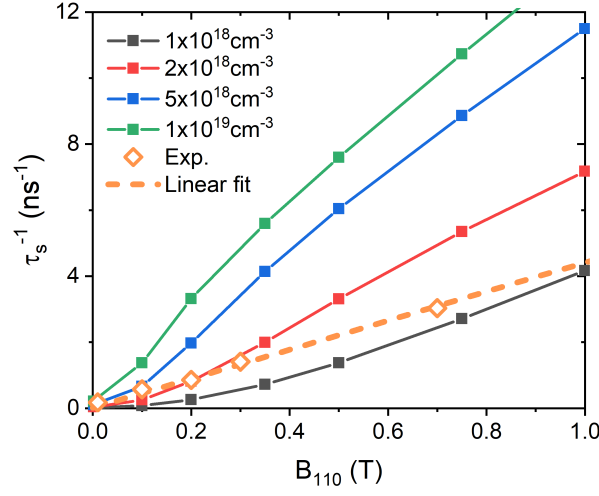

FIG. S13. The effects of transverse magnetic fields (perpendicular to spin direction) on electron  $\tau_s$  of pristine CsPbBr<sub>3</sub> under  $B \leq 1$  Tesla. Different solid lines denote  $\tau_s$  at different electron carrier density. The estimated experimental carrier density is around  $10^{18} \text{cm}^{-3}$  (corresponding to the black line here). The orange empty diamond denotes the experimental values, with dashed line as their linearly fitted values.

From Fig. S13, we find that the calculated  $\tau_s^{-1}(\mathbf{B}^{\text{ext}})$  is proportional to  $(B^{\text{ext}})^2$  at low  $B^{\text{ext}}$  (details in SI Fig. S13) following the DP mechanism.

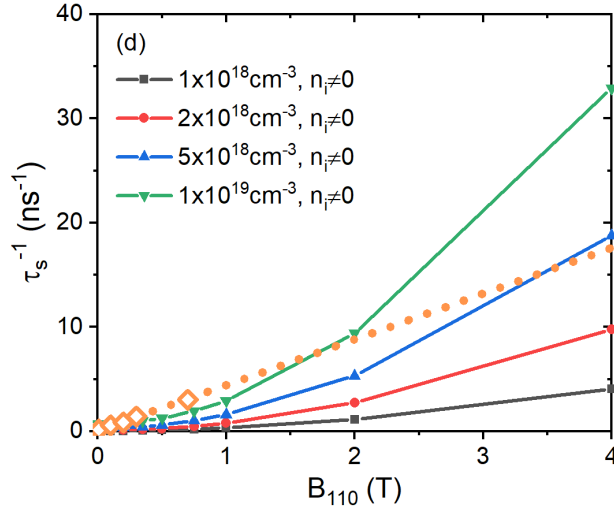

FIG. S14.  $\tau_s^{-1}$  as a function of  $B^{\text{ext}}$  at 4 K at different  $n_e$  considering the e-i scattering with  $10^{17} \text{cm}^{-3}$   $V_{\text{Pb}}$  neutral impurities.

By comparing Fig. 5c in the main text and Fig. S14d, we conclude that introducing more scattering such as adding impurities, weakens the  $\mathbf{B}^{\text{ext}}$ -dependence ( $\tau_s^{-1}$  increases slower with  $\mathbf{B}^{\text{ext}}$ ). The explanation is as follows. More scatterings lead to smaller  $\tau_p$  (thus smaller  $\tau_p \Delta\Omega$ ,  $(\tau_s^{\Delta\Omega})^{-1}$  closer to strong scattering limit in regime (ii), dominated by DP mechanism  $(\tau_s^{\text{DP}})^{-1}$ ). The latter is often much smaller than FID rate  $(\tau_s^{\text{FID}})^{-1}$  in regime (i) (the weak scattering limit). Meanwhile, more impurity scatterings give large zero- $\mathbf{B}$ -field rate  $(\tau_s^0)^{-1}$ . Together, increasing external scatterings, leading to an increase of  $(\tau_s^0)^{-1}$  and a decrease of  $(\tau_s^{\Delta\Omega})^{-1}$ , finally weakens the  $\mathbf{B}^{\text{ext}}$ -dependence of  $\tau_s^{-1}(\mathbf{B}^{\text{ext}})$ . From Fig. S14d, we find that with relatively strong impurity scattering (e.g. with  $10^{17} \text{cm}^{-3}$   $V_{\text{Pb}}$  neutral impurities), the  $\mathbf{B}^{\text{ext}}$ -dependence of  $\tau_s$  is in disagreement with experiments, indicating that impurity scattering is probably weaker in those experiments.

|                                                                  | Holes               | Electrons                             |
|------------------------------------------------------------------|---------------------|---------------------------------------|
| Relevant isotope                                                 | $^{207}\text{Pb}$   | $^{79}\text{Br}$ and $^{81}\text{Br}$ |
| Number of relevant nuclei in unitcell                            | 4                   | 12                                    |
| Nuclear spin $I$                                                 | 1/2                 | 3/2                                   |
| Abundance $\alpha$                                               | 22.1%               | Totally 100%                          |
| Hyperfine constant $A$ ( $\mu\text{eV}$ )                        | $\sim 25$           | $\sim 1.75$                           |
| Unit-cell volume $V_u$ ( $\text{nm}^3$ )                         | 0.833               |                                       |
| $C^{\text{loc}}$ ( $\text{nm}^3/\text{ns}^2$ , main-text Eq. 31) | $\sim 530$          | $\sim 180$                            |
| Localization radii (nm)                                          | 2.5-14 (Ref. 35–38) |                                       |
| $T_{2,\text{loc}}^*$ (ns)                                        | 0.35-4.6            | 0.6-8.0                               |

TABLE S2. Parameters used to estimate ensemble spin dephasing time of localized carriers  $T_{2,\text{loc}}^*$  of orthorhombic CsPbBr<sub>3</sub> due to nuclear spin fluctuation. We consider the Fermi contact contribution to hyperfine coupling, which was assumed to be the most important contribution in Refs. 22, 39, 40 for CsPbBr<sub>3</sub> and GaAs. For the Fermi contact contribution,  $s$  orbital is relevant since its wavefunction is considerable at the positions of the nuclei, while  $p$  and  $d$  orbitals are irrelevant. Considering that  $s$  orbitals of Pb and Br contribute considerably to Bloch functions of holes and electrons respectively,  $^{207}\text{Pb}$  and  $^{79/81}\text{Br}$  with non-zero  $I$  are relevant isotopes to hyperfine coupling for holes and electrons respectively. According to Eq. 27 in the main text,  $A \propto 1/V_u$ ,  $A$  of orthorhombic CsPbBr<sub>3</sub> is approximately 1/4 of  $A$  of cubic CsPbBr<sub>3</sub>, considering that their Bloch functions at the band edge are similar (e.g., their hole Bloch functions are both  $s$ -orbital-like) and  $V_u$  of orthorhombic CsPbBr<sub>3</sub> is about 4 times of that of cubic CsPbBr<sub>3</sub>.

## SIX. THE C-PPR(T) MEASUREMENTS

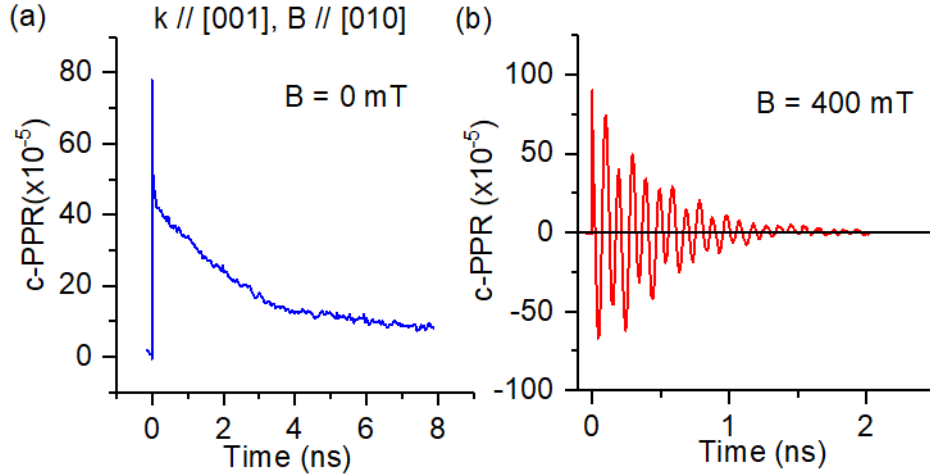

FIG. S15. Transient circularly-polarized photoinduced reflection in CsPbBr<sub>3</sub> single crystal excited at 405 nm measured at 4K on the (001) facet with  $B$  along [010] orientation. (a)  $B=0$  mT and (b)  $B=400$  mT. The spin lifetime in (a) is measured after the ‘coherence artifact’ seen at  $t=0$ . The spin lifetime in (b) is measured from the decay of the quantum beatings of the photocarriers.

- 
- [1] J. Xu, A. Habib, R. Sundararaman, and Y. Ping, Phys. Rev. B **104**, 184418 (2021).
  - [2] M. Wu, J. Jiang, and M. Weng, Phys. Rep. **493**, 61 (2010).
  - [3] C. Lü, J. Cheng, M. Wu, and I. da Cunha Lima, Phys. Lett. A **365**, 501 (2007).

- [4] R. Sundararaman, K. Letchworth-Weaver, K. A. Schwarz, D. Gunceler, Y. Ozhabes, and T. A. Arias, *SoftwareX* **6**, 278 (2017).
- [5] J. P. Perdew, K. Burke, and M. Ernzerhof, *Phys. Rev. Lett.* **77**, 3865 (1996).
- [6] D. R. Hamann, *Phys. Rev. B* **88**, 085117 (2013).
- [7] R. Sundararaman and Y. Ping, *J. Chem. Phys.* **146**, 104109 (2017).
- [8] N. Marzari and D. Vanderbilt, *Phys. Rev. B* **56**, 12847 (1997).
- [9] A. M. Brown, R. Sundararaman, P. Narang, W. A. Goddard, and H. A. Atwater, *ACS Nano* **10**, 957 (2016).
- [10] A. Habib, R. Florio, and R. Sundararaman, *J. Opt.* **20**, 064001 (2018).
- [11] C. Verdi and F. Giustino, *Phys. Rev. Lett.* **115**, 176401 (2015).
- [12] P. Giannozzi, S. Baroni, N. Bonini, M. Calandra, R. Car, C. Cavazzoni, D. Ceresoli, G. L. Chiarotti, M. Cococcioni, I. Dabo, *et al.*, *J. Phys. Condens. Matter* **21**, 395502 (2009).
- [13] X. Gonze and C. Lee, *Phys. Rev. B* **55**, 10355 (1997).
- [14] M. Puppin, S. Polishchuk, N. Colonna, A. Crepaldi, D. Dirin, O. Nazarenko, R. De Gennaro, G. Gatti, S. Roth, T. Barillot, *et al.*, *Phys. Rev. Lett.* **124**, 206402 (2020).
- [15] T. Woźniak, P. E. F. Junior, G. Seifert, A. Chaves, and J. Kunstmann, *Phys. Rev. B* **101**, 235408 (2020).
- [16] T. Deilmann, P. Krüger, and M. Rohlfing, *Phys. Rev. Lett.* **124**, 226402 (2020).
- [17] A. Mitioglu, K. Galkowski, A. Surrante, L. Kłopotowski, D. Dumcenco, A. Kis, D. K. Maude, and P. Plochocka, *Phys. Rev. B* **93**, 165412 (2016).
- [18] E. Engel and S. H. Vosko, *Phys. Rev. B* **47**, 13164 (1993).
- [19] J. Sun, A. Ruzsinszky, and J. P. Perdew, *Phys. Rev. Lett.* **115**, 036402 (2015).
- [20] P. Borlido, J. Schmidt, A. W. Huran, F. Tran, M. A. Marques, and S. Botti, *Npj Comput. Mater.* **6**, 1 (2020).
- [21] T. Paul, B. Chatterjee, S. Maiti, S. Sarkar, N. Besra, B. Das, K. Panigrahi, S. Thakur, U. Ghorai, and K. Chattopadhyay, *J. Mater. Chem. C* **6**, 3322 (2018).
- [22] V. V. Belykh, D. R. Yakovlev, M. M. Glazov, P. S. Grigoryev, M. Hussain, J. Rautert, D. N. Dirin, M. V. Kovalenko, and M. Bayer, *Nat. Commun.* **10**, 673 (2019).
- [23] E. Kirstein, D. Yakovlev, M. Glazov, E. Zhukov, D. Kudlacik, I. Kalitukha, V. Sapega, G. Dimitriev, M. Semina, M. Nestoklon, *et al.*, *Nat. Commun.* **13**, 3062 (2022).
- [24] F. Xuan and S. Y. Quek, *Phys. Rev. Research* **2**, 033256 (2020).
- [25] I. Žutić, J. Fabian, and S. D. Sarma, *Rev. Mod. Phys.* **76**, 323 (2004).
- [26] D. Zhang, Y. Yang, Y. Bekenstein, Y. Yu, N. A. Gibson, A. B. Wong, S. W. Eaton, N. Kornienko, Q. Kong, M. Lai, *et al.*, *J. Am. Chem. Soc.* **138**, 7236 (2016).
- [27] Y. Zhu, Q. Cui, J. Chen, F. Chen, Z. Shi, X. Zhao, and C. Xu, *ACS Appl. Mater. Interfaces* **13**, 6820 (2021).
- [28] B. A. Koscher, Z. Nett, and A. P. Alivisatos, *ACS Nano* **13**, 11825 (2019).
- [29] S. Poncé, W. Li, S. Reichardt, and F. Giustino, *Rep. Prog. Phys.* **83**, 036501 (2020).
- [30] C. J. Ciccarino, T. Christensen, R. Sundararaman, and P. Narang, *Nano Lett.* **18**, 5709 (2018).
- [31] T. Gunst, T. Markussen, K. Stokbro, and M. Brandbyge, *Phys. Rev. B* **93**, 035414 (2016).
- [32] G. D. Mahan, *Many-Particle Physics* (Springer US, 2000).
- [33] R. Kubo, *Rep. Prog. Phys.* **29**, 255 (1966).
- [34] Y. He, Z. Liu, K. M. McCall, W. Lin, D. Y. Chung, B. W. Wessels, and M. G. Kanatzidis, *Nucl. Instrum. Methods Phys. Res. A* **922**, 217 (2019).
- [35] Q. Qian, Z. Wan, H. Takenaka, J. K. Keum, T. J. Smart, L. Wang, P. Wang, J. Zhou, H. Ren, D. Xu, *et al.*, *Nat. Nanotechnol.* **18**, 357 (2023).
- [36] D. M. Hofmann, A. Hofstaetter, F. Leiter, H. Zhou, F. Henecker, B. K. Meyer, S. B. Orlinskii, J. Schmidt, and P. G. Baranov, *Phys. Rev. Lett.* **88**, 045504 (2002).
- [37] K. Miyata, D. Meggiolaro, M. T. Trinh, P. P. Joshi, E. Mosconi, S. C. Jones, F. De Angelis, and X.-Y. Zhu, *Sci. Adv.* **3**, e1701217 (2017).
- [38] K. T. Munson, E. R. Kennehan, G. S. Doucette, and J. B. Asbury, *Chem* **4**, 2826 (2018).
- [39] M. Syperek, D. Yakovlev, I. Yugova, J. Misiewicz, I. Sedova, S. Sorokin, A. Toropov, S. Ivanov, and M. Bayer, *Phys. Rev. B* **84**, 085304 (2011).
- [40] I. Merkulov, A. L. Efros, and M. Rosen, *Phys. Rev. B* **65**, 205309 (2002).
